# Supplementary material for: Chimeric Genes in Deletions and Duplications Associated with Intellectual Disability
Source: Hindawi journal article supplement (doi:10.1155/2017/4798474), 2017-01-01
Supplement: f1 [file 4798474.f1.pdf]

# Supplementary table

Table S1: PCR reagents and programs, as well as sequence and size of each amplicon, if applicable, use in the different PCR reactions. All general reagents are from Roche except from Taq enzyme that is from Biotools.

| Primer        | Sequence                  | PCR reagents                                                                                                            | PCR program                                                                                              | Size (bp)      |           |
|---------------|---------------------------|-------------------------------------------------------------------------------------------------------------------------|----------------------------------------------------------------------------------------------------------|----------------|-----------|
| LIMS1_F1      | CCATTGAGCAGGATAGAGGATG    | 1µl gDNA (100ng/µl)<br>1X PCR reac Buffer2<br>2.5U Taq Expand<br>480µM dNTPs<br>1µM Primer F<br>1µM Primer R<br>25µl Vf | 3min 94°C<br>30s 94°C<br>30s 65°C<br>8min 68°C<br>30s 94°C<br>30s 65°C<br>8min 68°C +20s/cy<br>7min 68°C | Not applicable | Patient 1 |
| LIMS1_F2      | TAGGGAATTGAGGACCTCGCAC    |                                                                                                                         |                                                                                                          |                |           |
| LIMS1_F3      | GGTAGGGCTCCGAGGGGCTCGC    |                                                                                                                         |                                                                                                          |                |           |
| LIMS1_F4      | TCTAGAAATGCTGACCCAGGC     |                                                                                                                         |                                                                                                          |                |           |
| LIMS1_F5      | GTGAGGGTATGCCATGAGCTAG    |                                                                                                                         |                                                                                                          |                |           |
| LIMS1_F6      | ATCAGTGAGGTGCTTCAGAAGC    |                                                                                                                         |                                                                                                          |                |           |
| LIMS1_F7      | GGACAGAAACAGCAAGCTCACC    |                                                                                                                         |                                                                                                          |                |           |
| LIMS1_F8      | GAAGCCAGTCTGTAAAGAAGTGC   |                                                                                                                         |                                                                                                          |                |           |
| RANBP2_R1     | GAGCAGCTGTTACAATGCCACC    |                                                                                                                         |                                                                                                          |                |           |
| RANBP2_R2     | CAAGCCAGTCATGAAGCATGCC    |                                                                                                                         |                                                                                                          |                |           |
| RANBP2_R3     | CAGAAATGGGGAGGACTATCAGC   |                                                                                                                         |                                                                                                          |                |           |
| RANBP2_R4     | TGGACTGTCCGCTGTTCATC      |                                                                                                                         |                                                                                                          |                |           |
| RANBP2_R5     | ATCCAAATCACCTGTCAACGAC    |                                                                                                                         |                                                                                                          |                |           |
| LIMS1F3.5     | GTGATGAACATGGTGTGTCTGC    | 1µl gDNA (100ng/µl)<br>1X PCR reac Buffer + Mg<br>2.5U Taq<br>240µM dNTPs                                               | 3min 94°C<br>1min 94°C<br>30s 67°C                                                                       | 1666           |           |
| RANBP2R3.5    | TCAAAAGTGTGTTGCTACTGAAGAG | 1µM Primer F<br>1µM Primer R<br>25µl Vf                                                                                 | 1min 72°C<br>7min 72°C                                                                                   |                |           |
| LIMS1E2F      | TCGCAGTGATGTGAAACTGG      | 1µl cDNA<br>1X PCR reac. Buffer + Mg<br>2.5U Taq<br>240µM dNTPs                                                         | 4min 94°C<br>30s 94°C<br>30s 55°C<br>30s 72°C                                                            | 208            | Patient 2 |
| RANBP2E20-27R | TTACTTCTACCTCTGGTAGTG     | 500nM Primer F<br>500nM Primer R<br>50µl Vf                                                                             | 7min 72°C                                                                                                | 426            |           |
| ARID1BE5F     | CATGTCTCAGGAAGGCTATGG     | 1µl gDNA (40ng/µl)<br>1X LC480 Probes Master mix<br>300nM Primer F<br>300nM Primer R<br>10µl Vf                         | 10min 94°C<br>10s 94°C<br>10s 55°C<br>10s 72°C<br>5s 95°C<br>1min 65°C<br>0.57°C/s 97°C                  | 177            |           |
| ZDHHC14E3R    | CGCAGTTATCACAAGGCTGC      |                                                                                                                         |                                                                                                          | 286            |           |
| ARID1BE5F     | CATGTCTCAGGAAGGCTATGG     |                                                                                                                         |                                                                                                          | 235            |           |
| ZDHHC14E2R    | CAAAGAAGAACAGGATGCCAG     |                                                                                                                         |                                                                                                          | 218            |           |
| ARID1BE5F     | CATGTCTCAGGAAGGCTATGG     |                                                                                                                         |                                                                                                          | 259            |           |
| ZDHHC14E2R    | CAAAGAAGAACAGGATGCCAG     |                                                                                                                         |                                                                                                          | 161            |           |
| ARID1BE5F     | CATGTCTCAGGAAGGCTATGG     |                                                                                                                         |                                                                                                          | 147            |           |
| ARID1BE5R     | TATCCAGGACTACAGAGCTCC     |                                                                                                                         |                                                                                                          |                |           |
| ARID1BE6F     | GTCTGGCTCCATTGATGACC      |                                                                                                                         |                                                                                                          |                |           |
| ARID1BE6R     | GATACTTGCAGGAGAGATTGG     |                                                                                                                         |                                                                                                          |                |           |
| ZDHHC14E1F    | AAGACTGCGAGTACAGCCAG      |                                                                                                                         |                                                                                                          |                |           |
| ZDHHC14E1R    | CTCGAAGGCGAAGAAGAGTC      |                                                                                                                         |                                                                                                          |                |           |
| KIAA1586_F2   | TTGCTGTAGCTCAGAGTC        | 1µl gDNA (100ng/µl)<br>1X PCR reac Buffer3<br>2.5U Taq Expand<br>480µM dNTPs                                            | 3min 94°C<br>30s 94°C<br>30s 56°C<br>2min 68°C                                                           | 1891           | Patient 3 |
| KIAA1586_R1   | GAAACATTAGACAGACACTCC     | 1µM Primer F<br>1µM Primer R<br>25µl Vf                                                                                 | 30s 94°C<br>30s 56°C<br>2min 68°C +20s/cy<br>7min 68°C                                                   | 1942           |           |
| ZNF451_F3     | CTTCGCTATCTCACAGGAC       |                                                                                                                         |                                                                                                          | 1934           |           |
| KIAA1586_R1   | GAAACATTAGACAGACACTCC     |                                                                                                                         |                                                                                                          |                |           |
| ZNF451_F3     | CTTCCCAGTGCTTCGCTATC      |                                                                                                                         |                                                                                                          |                |           |
| ZNF451_R3     | TGCACATCTGACACTCAACG      |                                                                                                                         |                                                                                                          |                |           |
